# Supplementary material
Source: PubMed Central journal article supplement (PMC4107656)
Supplement: NIHMS608739-supplement-supplementary.pdf [file NIHMS608739-supplement-supplementary.pdf]

## Materials and Methods

### 1. Sequencing and Assembly

A highly inbred strain of *Drosophila miranda* (strain MSH22) was used for genome sequencing and RNA-seq analysis. Genomic DNA was extracted separately for pooled males and females (DNeasy Blood & Tissue Kit, Qiagen), sheared and size-selected. We prepared mate-pair libraries with an insert size of 210bp and sequenced 75bp reads from both ends following the standard manufacturer's instructions. We sequenced 3 lanes from both the male and female library, resulting in a total of 4.4 Gb and 5.0 Gb of high-quality reads, respectively (a total of over 60 million high-quality read pairs, i.e. ~30-fold coverage for each sex, implying 45-fold coverage for the X and neo-X, 15-fold coverage for the Y and neo-Y, and 60-fold coverage for autosomes).

High levels of sequence similarity between the neo-sex chromosomes and heterochromatic DNA in males deteriorate joint assemblies (table S1); thus we initially assembled male and female short reads separately into scaffolds using SOAPdenovo (<http://soap.genomics.org.cn/soapdenovo.html>, -K 31) (26). A high proportion of reads (>78%) participated in the assemblies, resulting in a genome size of about 125Mb and N50 lengths of 5.3kb and 13.8kb for male and female, respectively. We ordered as many scaffolds of *D. pseudoobscura* as possible into chromosomal sequences based on physical map information (27), in order to assign locations of *D. miranda* scaffolds. We aligned male and female *D. miranda* scaffolds against the chromosomal sequences of *D. pseudoobscura* using BLAST (28) (-e 1e-5), and grouped male and female scaffolds mapping to chromosomes other than chr3 (the neo-sex chromosome of *D. miranda*) together as the 'non-neo-sex' scaffolds, and the female scaffolds mapping to chr3 as 'neo-X' scaffolds. Short reads were then mapped to these two groups of scaffolds by SOAP (29), adjusting for mate-pair direction and insert-size information. We collected a total of 5.4 Gb non-neo-sex short reads from both sexes, and these pooled reads were used to re-assemble the non-neo-sex chromosomes of *D. miranda*, resulting in an improved assembly of autosomal and X chromosome scaffolds (with a N50 statistics of 23.7kb; i.e. 50% of the genome assembly is contained in scaffolds equal or larger to this value). (table S1).

To assemble the neo-Y chromosome, we need to distinguish reads derived from the neo-X and neo-Y from the male reads pool. We first separately used the male and female reads, and identified all the SNP sites along the neo-X scaffolds by SOAPsnp, with a cutoff of at least 3 uniquely-mapped supporting reads for both SNP sites (30). All the male reads containing male-specific SNPs were collected into the neo-Y reads pool, and those that mapped to the neo-X sequence at such sites were added to the neo-X reads pool. We also counted mapped reads number for each site of the neo-X scaffolds, and then calculated mapping coverage as the average reads count within 100bp sliding windows. We investigated the ratios of mapping coverage calculated from male reads versus female reads, in order to compartmentalize the divergent and non-divergent regions between neo-X and neo-Y chromosomes. The distribution of the ratio reveals two pronounced peaks centered at 1 and 0.5 (fig. S1), which correspond to the non-divergent and divergent regions between the neo-sex chromosomes. We defined all the regions with coverage lower than 0.5 as divergent regions. Reads mapping to these regions but not harboring any male-specific SNPs were removed from the male reads pool as neo-X reads. We combined all the remaining male reads (including all non-divergent regions) and neo-Y reads collected before, and performed a second round of *de novo* assembly for neo-Y scaffolds, as well as scaffolds from the neo-X and other chromosomes using reads of both sexes. Gaps within the scaffolds were finally filled by extending the mapped reads into the gap region by the Gapcloser module of SOAPdenovo.

We assessed the quality of our assemblies by comparing it to over 4-Mb of Sanger- and 454-derived BAC sequences (16, 31). The integrity of the assembly was measured by BLAT alignment (using default parameters) as the ratio of summed aligned block lengths vs. target sequence length, while the accuracy was measured as ratio of identical cases vs. aligned lengths.

91.1% of neo-X and 65.1% of neo-Y BAC sequences collinearly aligned with the corresponding short-read assemblies, with alignment identities of 99.9% and 99.2%. Autosomal and X-linked BAC clones also show high alignment scores (90.5% aligned with 99.9% identity). Coding regions show similarly high alignment rate (99.1% vs. 94.9%) and identity (99.9% vs. 99.4%) for the neo-X and neo-Y. This suggests that lower alignment scores on the neo-Y mainly result from difficulties in assembling repetitive intergenic regions or structural variations (see fig. S2, table S2).

To further validate the assembly, and independently verify partly or entirely deleted genes from the neo-Y, we additionally sequenced males from the same *D. miranda* strain at medium genomic coverage with 454 technology. We produced 947,399 reads (maximum read length: 1,433-bp, mode read length 746-bp, median read length 667-bp), adding up to 587Mb (~5 fold genomic coverage) of data. Comparison of these raw reads to the Illumina assembly reveals a similarly high coverage (~90%) and identity (99.5%) on autosomes, and slightly lower similarities on chrXL, chrXR and the neo-sex chromosomes, due to lower sequencing coverage (table S3). We aligned male 454 reads back to the Illumina assemblies, to confirm partially or completely deleted neo-Y genes (fig. S3). Genes identified as having deletions from the neo-Y consistently show a length difference with the 454 raw reads (fig. S3A) or a lower male vs. female mapping coverage (fig. S3B), comparing to complete neo-Y genes.

## 2. Mapping and Annotation

To order the *D. miranda* scaffolds into chromosomes, we aligned the scaffolds against *D. pseudoobscura* chromosomes with BLAST (2) (-e 1e-5). Alignment hits of the same query scaffold with intervals shorter than 10kb were grouped together based on collinearity and screened with a 30% alignment length percentage cutoff. The best hit as well as others whose length percentages differ with that of the best one less than 10% were maintained as ‘mapped’ *D. miranda* scaffolds. Scaffolds aligned to an overlapping region of *D. pseudoobscura* with another longer scaffold were removed as redundancies. We then ordered and concatenated *D. miranda* scaffolds into chromosomes, filling gaps between them with the same size as the *D. pseudoobscura* region between the two alignment hits. Neo-X and neo-Y scaffolds were ordered separately into neo-X and neo-Y chromosomal sequences.

We aligned (TBLASTN, -e 1e-5) the protein sequences of *D. pseudoobscura* ([www.flybase.org](http://www.flybase.org), v2.6) with the *D. miranda* chromosomal sequences to annotate *D. miranda* genes. Collinear alignment hits of the same protein query distant from each other with a length shorter than 10kb were chained together and the whole spanned genomic regions were taken as the candidate *D. miranda* gene regions. We finally used GeneWise (version 2.41) (32) and predicted open reading frames for *D. miranda* genes. We applied the annotation procedure to the neo-X and neo-Y chromosome separately. Putatively non-functional genes along the neo-Y chromosome were characterized as those with either premature terminal codons (PTC) or frame-shift mutations.

We validated PTCs in non-functional neo-Y genes by examining 454 reads aligned to these stop codon sites. Out of 118 neo-Y linked genes with PTC, 454 reads mapped (at least partly) to 81 genes (68.6%) in our neo-Y assembly, and 67 of these aligned copies (82.7%) have at least one 454 read supporting the PTC. In the remaining 41 cases, the read did not span the PTC or did not overlap other SNPs, preventing us to distinguish between the neo-X and neo-Y copy. Thus, despite the relatively low coverage of the 454 data, we could verify a large fraction of the PTC on the neo-Y.

We also compared our non-functional gene set to a list of 118 previously studied neo-sex gene pairs (70 functional, 48 non-functional) that were manually annotated using *D. pseudoobscura* gene models as a guide (16). We compared these data with our Illumina assembly and the 454 sequencing reads, and identified 5 cases where our Illumina assembly inferred a functional gene that was identified as a pseudogene in the previous study (16) and confirmed as

such by 454 reads; these cases appear to be caused by assembly artifacts, where neo-X reads are incorporated into a neo-Y scaffold. In contrast, we never incorrectly annotated a functional gene as a pseudogene on the neo-Y when comparing the two assemblies. Thus, our false positive rate is 0 (calling a functional gene a pseudogene) and our false-negative rate (missing a pseudogene) is ~10%. On the neo-X, all but 2 genes were correctly annotated; one of the missing genes did not pass our sequence identity cutoff, and the second was in a region of poor assembly quality.

### 3. Evolutionary Analysis

We calculated SNP densities and read coverage every 50kb based on the neo-X chromosome as the reference, with a sliding window size of 5kb. The mapping and SNP calling procedures are the same as described above and results were plotted with *Circos* (33). We identified pairs of regions that failed to align between the neo-sex chromosomal sequences, with at least 100bp aligned at their flanking regions. These are divergent regions homologous to each other, and we then ran RepeatMasker (<http://www.repeatmasker.org/>) on regions with either of the pair longer than 500bp to compare their repeat contents (fig. S2A). We identified violations of pair-end mapping or insert distance (differ by at least 150bp) as signs of structural variations, using a similar algorithm as described in (34). For example, at a tandem duplication in the genome, read pairs spanning the duplicate boundary would be aligned as ‘reverse-forward’ rather than the normal ‘forward-reverse’ direction (34). A more stringent criterion of at least 5 informative read pairs were required for identifying a SV event.

For the gene ontology study, we classified *D. miranda* genes into GO categories, using information from their *D. melanogaster* orthologs and subjected them to enrichment analysis relative to the gene content of the entire genome using *Ontologizer* (35). We aligned coding sequences of neo-X, neo-Y and the orthologous *D. pseudoobscura* genes guided by the protein sequence using *TranslatorX* (36). We then used a likelihood method to calculate the pairwise  $\omega$  (the ratio of amino-acid ( $K_a$ ) vs. synonymous site ( $K_s$ ) divergence) between *D. miranda* and *D. pseudoobscura* genes (37). Any genes with either  $K_a$  or  $K_s$  higher than 0.5 or  $\omega$  value higher than 5 were excluded from further analysis, due to possible alignment artifacts or too few synonymous changes. To detect elevated evolution along specific branches, we used *codeml* of the *PAML* package and first assumed  $\omega$  to be the same for the neo-X, neo-Y and outgroup branch (one-ratio model). The two-ratio model, allowing two different  $\omega$  values (one for the branch of interest and another one for the background branches) was then compared to the one-ratio null model (38). Twice the log likelihood difference was compared with a  $\chi^2$  distribution to test whether the data fits the two-ratio model significantly better (39). The free-ratio model, which allows different  $\omega$  ratios for all the branches investigated, was used to calculate branch-specific evolutionary rates. Optimal codons for *Drosophila* were taken from reference (40).

### 4. Expression analysis

We prepared RNA-seq libraries from whole adult virgins of males and females, as well as dissected testes, accessory glands, male body carcasses, ovaries and female body carcasses from both *D. miranda* and *D. pseudoobscura*. Virgin flies were collected and aged for an extra week allowing for maturation before the dissection and RNA extraction (RNAeasy Tissue Kit, Qiagen). Poly(A)+ transcripts were isolated using Dynal magnetic beads (Invitrogen) and fragmented by ‘RNA fragmentation reagent’ (Ambion). Random primers were used to reverse transcribe the mRNAs and the mate-pair libraries with an insert size of about 250bp were prepared following the manufacturer’s standard protocol. Each sample has been sequenced on one lane and 75bp from both ends (2~4Gb data per sample).

We aligned the RNA-seq reads against the neo-X chromosome sequence with *TopHat* (41) and assigned individual reads as neo-X or neo-Y linked based on the pre-identified genomic SNP information. Neo-X or neo-Y reads spanning diagnostic SNPs within a gene were summed together to measure the allelic expression level. We used logarithmic-scaled ratios of neo-X read number vs. neo-Y read number to measure the degree of neo-X biased expression. We conservatively set the allelic read counts as 10 when they are lower than 10, for performing the binomial test of significance of biased gene expression. The expression levels of genes were calculated as FPKM (fragments per kilobase of exon per million fragments mapped) as defined by *Cufflinks* (42). We ranked expression level of genes along each chromosome by their FPKM values, and investigated chromosomal distributions of top 100, 200, 500, 1000, 2000 genes. The expected numbers of top expressed genes on each chromosome were calculated using total gene number of that chromosome assuming an even distribution. Patterns of demasculinization do not change for different numbers of genes investigated and only the pattern of top 500 genes is shown. For the regression analysis, we used expression levels from *D. pseudoobscura* as a proxy for ancestral expression level of *D. miranda* genes prior to the formation of the neo- X chromosome, so that we could exclude possible demasculinization effects on gene expression. We used logarithmic-scaled FPKM values and  $\omega$  ratios, and excluded genes without any detectable expression or nonsynonymous changes from the analysis.

**table S1 Assembly statistics using male, female or pooled reads**

|        | Scaffold<br>N50 (bp) | Average<br>Scaffold<br>Length (bp) | Scaffold<br>Numbers | Longest<br>Scaffold (bp) | Assembled<br>Size (Mbp)<br>incl. Ns | Reads<br>Participated<br>(%) |
|--------|----------------------|------------------------------------|---------------------|--------------------------|-------------------------------------|------------------------------|
| ♂      | 5312                 | 2289                               | 52580               | 128191                   | 120                                 | 78.2                         |
| ♀      | 13773                | 5637                               | 22259               | 102796                   | 125                                 | 82.7                         |
| ♂+♀    | 5007                 | 2376                               | 47035               | 41135                    | 112                                 | 69.8                         |
| neo-X  | 23056                | 7112                               | 2659                | 89551                    | 20                                  | NA                           |
| neo-X* | 27677                | 18533                              | 832                 | 89551                    | 15.4                                | NA                           |
| neo-Y  | 715                  | 476                                | 36282               | 10995                    | 22                                  | NA                           |
| neo-Y* | 2298                 | 1880                               | 1962                | 10995                    | 3.7                                 | NA                           |

\* Assembly statistics using only scaffolds that contain coding regions

**table S2 Structural variation numbers on each chromosome identified by male or female reads**

| Male/female           | chrXL | chrXR | chr2  | neo-X/Y | chr4  | chr5 |
|-----------------------|-------|-------|-------|---------|-------|------|
| Deletion              | 31/56 | 43/73 | 96/89 | 134/51  | 72/78 | 5/0  |
| Dispersed Duplication | 2/3   | 3/5   | 8/7   | 7/7     | 10/11 | 0/0  |
| Tandem Duplication    | 14/16 | 24/29 | 39/35 | 24/15   | 37/39 | 0/0  |

**table S3 Similarity between male 454 reads and the Illumina assembly**

|                           | chrXL          | chrXR          | chr2           | chr4           | neo-X           | neo-Y           |
|---------------------------|----------------|----------------|----------------|----------------|-----------------|-----------------|
| Aligned bp                | 15170000       | 21295168       | 25039899       | 28347019       | 17696342        | 18921553        |
| Total length              | 20731836       | 29473195       | 27885022       | 31286013       | 20038917        | 22216834        |
| Aligned                   | 73.17%         | 72.25%         | 89.80%         | 90.61%         | 88.31%          | 85.17%          |
| Identity<br>(mean/median) | 98.7%/<br>100% | 99.1%/<br>100% | 99.5%/<br>100% | 99.5%/<br>100% | 98.5%/<br>98.9% | 97.8%/<br>98.7% |

**table S4 Genomic divergence between the neo-sex chromosomes**

Average coverage (cvg.) and SNP density (dst.) calculated from male and female *D. miranda* reads for each chromosome are shown. Increased SNP density of the neo-sex chromosomes in males reflects divergence between neo-X/neo-Y chromosomes.

|                       | chrXL  | chrXR  | neo-sex<br>(chr3) | chr2   | chr4   | chr5   |
|-----------------------|--------|--------|-------------------|--------|--------|--------|
| ♂ cvg.                | 8.205  | 8.017  | 12.190            | 16.237 | 15.250 | 10.806 |
| ♀ cvg.                | 15.803 | 15.466 | 16.837            | 15.859 | 15.226 | 11.573 |
| ♂ SNP dst. (sites/kb) | 0.071  | 0.045  | 3.696             | 0.161  | 0.075  | 0.125  |
| ♀ SNP dst. (sites/kb) | 0.097  | 0.061  | 0.080             | 0.142  | 0.071  | 0.098  |



**table S5 Enriched GO terms for genes with intact neo-Y ORFs**

| GO ID      | Namespace          | Name                                               | P-value     |
|------------|--------------------|----------------------------------------------------|-------------|
| GO:0007268 | biological_process | synaptic transmission                              | 0.003517419 |
| GO:0016202 | biological_process | regulation of striated muscle tissue development   | 0.009399237 |
| GO:0048634 | biological_process | regulation of muscle organ development             | 0.003859401 |
| GO:0042052 | biological_process | rhabdomyere development                            | 0.005932791 |
| GO:0008300 | biological_process | isoprenoid catabolic process                       | 0.00979735  |
| GO:0051231 | biological_process | spindle elongation                                 | 0.004891947 |
| GO:0006818 | biological_process | hydrogen transport                                 | 0.003586818 |
| GO:0009636 | biological_process | response to toxin                                  | 1.58E-04    |
| GO:0044087 | biological_process | regulation of cellular component biogenesis        | 0.002196067 |
| GO:0035149 | biological_process | lumen formation, open tracheal system              | 0.005982934 |
| GO:0007113 | biological_process | endomitotic cell cycle                             | 0.009360521 |
| GO:0007173 | biological_process | epidermal growth factor receptor signaling pathway | 0.006608712 |
| GO:0065007 | biological_process | biological regulation                              | 0.007005348 |
| GO:0044237 | biological_process | cellular metabolic process                         | 0.005286921 |
| GO:0006716 | biological_process | juvenile hormone metabolic process                 | 0.007905138 |
| GO:0031989 | biological_process | bombesin receptor signaling pathway                | 0.006974717 |
| GO:0032501 | biological_process | multicellular organismal process                   | 2.23E-05    |
| GO:0014070 | biological_process | response to organic cyclic compound                | 0.003792779 |
| GO:0007307 | biological_process | eggshell chorion gene amplification                | 6.15E-04    |
| GO:0015992 | biological_process | proton transport                                   | 0.005379925 |
| GO:0003014 | biological_process | renal system process                               | 0.002577951 |
| GO:0019731 | biological_process | antibacterial humoral response                     | 0.00978717  |
| GO:0000022 | biological_process | mitotic spindle elongation                         | 0.002597837 |
| GO:0048519 | biological_process | negative regulation of biological process          | 0.006761734 |
| GO:0032502 | biological_process | developmental process                              | 0.00417023  |
| GO:0000267 | cellular_component | cell fraction                                      | 5.31E-04    |
| GO:0005940 | cellular_component | septin ring                                        | 0.002102785 |
| GO:0044422 | cellular_component | organelle part                                     | 3.96E-04    |
| GO:0005839 | cellular_component | proteasome core complex                            | 0.004906022 |
| GO:0019773 | cellular_component | proteasome core complex, alpha-subunit complex     | 0.002425214 |
| GO:0005623 | cellular_component | cell                                               | 6.22E-04    |
| GO:0031105 | cellular_component | septin complex                                     | 2.33E-04    |
| GO:0032156 | cellular_component | septin cytoskeleton                                | 3.90E-04    |
| GO:0016469 | cellular_component | proton-transporting two-sector ATPase complex      | 0.006140409 |
| GO:0016604 | cellular_component | nuclear body                                       | 4.42E-04    |
| GO:0043226 | cellular_component | organelle                                          | 9.28E-04    |
| GO:0030532 | cellular_component | small nuclear ribonucleoprotein complex            | 0.009501371 |
| GO:0044464 | cellular_component | cell part                                          | 6.22E-04    |

---

|            |                    |                                                            |             |
|------------|--------------------|------------------------------------------------------------|-------------|
| GO:0032991 | cellular_component | macromolecular complex                                     | 2.70E-04    |
| GO:0005372 | molecular_function | water transmembrane transporter activity                   | 1.51E-05    |
| GO:0005217 | molecular_function | intracellular ligand-gated ion channel activity            | 0.003863038 |
| GO:0004972 | molecular_function | N-methyl-D-aspartate selective glutamate receptor activity | 0.001832845 |
| GO:0020037 | molecular_function | heme binding                                               | 0.002061428 |
| GO:0004693 | molecular_function | cyclin-dependent protein kinase activity                   | 0.002582101 |
| GO:0015250 | molecular_function | water channel activity                                     | 7.63E-04    |
| GO:0022891 | molecular_function | substrate-specific transmembrane transporter activity      | 0.002521138 |
| GO:0004946 | molecular_function | bombesin receptor activity                                 | 0.006644518 |
| GO:0070003 | molecular_function | threonine-type peptidase activity                          | 0.001580524 |
| GO:0004175 | molecular_function | endopeptidase activity                                     | 0.009983873 |
| GO:0004298 | molecular_function | threonine-type endopeptidase activity                      | 0.004006073 |
| GO:0022892 | molecular_function | substrate-specific transporter activity                    | 0.007549218 |
| GO:0051864 | molecular_function | histone demethylase activity (H3-K36 specific)             | 0.003658537 |
| GO:0008324 | molecular_function | cation transmembrane transporter activity                  | 0.001146674 |
| GO:0042625 | molecular_function | ATPase activity, coupled to transmembrane movement of ions | 8.37E-04    |
| GO:0009055 | molecular_function | electron carrier activity                                  | 5.72E-04    |
| GO:0005549 | molecular_function | odorant binding                                            | 0.001231431 |

---

**table S6 Enriched GO terms for genes with disrupted neo-Y ORFs**

| GO ID      | Namespace          | Name                                        | P-value     |
|------------|--------------------|---------------------------------------------|-------------|
| GO:0046834 | biological_process | lipid phosphorylation                       | 0.009405102 |
| GO:0019637 | biological_process | organophosphate metabolic process           | 0.00793824  |
| GO:0046165 | biological_process | alcohol biosynthetic process                | 3.86E-05    |
| GO:0007165 | biological_process | signal transduction                         | 0.005367977 |
| GO:0034660 | biological_process | ncRNA metabolic process                     | 0.002410273 |
| GO:0016042 | biological_process | lipid catabolic process                     | 0.009193045 |
| GO:0045017 | biological_process | glycerolipid biosynthetic process           | 0.005724206 |
| GO:0000271 | biological_process | polysaccharide biosynthetic process         | 0.005799694 |
| GO:0006094 | biological_process | gluconeogenesis                             | 0.002235584 |
| GO:0046364 | biological_process | monosaccharide biosynthetic process         | 0.007182709 |
| GO:0006418 | biological_process | tRNA aminoacylation for protein translation | 0.005981961 |
| GO:0030719 | biological_process | P granule organization                      | 0.008757257 |
| GO:0006032 | biological_process | chitin catabolic process                    | 0.003842729 |
| GO:0030030 | biological_process | cell projection organization                | 0.00993608  |
| GO:0044242 | biological_process | cellular lipid catabolic process            | 0.008319245 |
| GO:0034637 | biological_process | cellular carbohydrate biosynthetic process  | 9.76E-06    |
| GO:0071554 | biological_process | cell wall organization or biogenesis        | 0.009837782 |
| GO:0019319 | biological_process | hexose biosynthetic process                 | 7.15E-04    |
| GO:0016051 | biological_process | carbohydrate biosynthetic process           | 1.02E-04    |
| GO:0015630 | cellular_component | microtubule cytoskeleton                    | 0.002655754 |
| GO:0031224 | cellular_component | intrinsic to membrane                       | 6.88E-04    |
| GO:0016020 | cellular_component | membrane                                    | 0.006296849 |
| GO:0015294 | molecular_function | solute:cation symporter activity            | 0.002948052 |
| GO:0005042 | molecular_function | netrin receptor activity                    | 0.008576329 |
| GO:0004984 | molecular_function | olfactory receptor activity                 | 0.005925269 |

**table S7 Comparison of evolutionary rates of *D. miranda* genes relative to *D. pseudoobscura***

|                    | autosomes      | chrX           | neo-X          | functional neo-Y | non-functional neo-Y |
|--------------------|----------------|----------------|----------------|------------------|----------------------|
| Studied gene pairs | 6166           | 4312           | 2379           | 1103             | 902                  |
| $K_a$ in %         | 1.8608(0.6804) | 1.7138(0.6335) | 1.2707(0.5995) | 1.6030(1.0990)   | 2.4870(1.6380)       |
| $K_s$ in %         | 6.2842(4.8661) | 5.6914(4.4451) | 5.4247(4.6062) | 5.8600(5.2760)   | 7.5480(6.4280)       |
| $K_a/K_s$          | 0.2721(0.1512) | 0.2835(0.1496) | 0.2485(0.1345) | 0.3092(0.2154)   | 0.3524(0.2697)       |
| Fop                | 0.6300(0.6358) | 0.6683(0.6748) | 0.6504(0.6586) | 0.6494(0.6556)   | 0.6410(0.6482)       |

This table shows the average (median) values of non-synonymous substitution rates ( $K_a$ ), synonymous substitution rates ( $K_s$ ) and frequency of optimal codons (Fop) for all the genes along each chromosome. Genes with pairwise  $K_a$  or  $K_s$  larger than 0.5 or  $K_a/K_s$  ratio higher than 5 were removed.

**table S8 Sexually antagonistic genes on the neo-sex chromosomes of *D. miranda*.**

Significance was assessed using a series of Fisher's exact tests by comparing the gene content of the ancestral neo-sex chromosome against either fast evolving neo-Y genes or non-functional neo-Y genes, to test for an enrichment of a specific fitness category among different gene sets (\*  $p < 0.05$ ; \*\*  $p < 0.01$ ).

|                            | investigated<br>gene # | ♂ fitness<br>related | ♀ fitness<br>related | ♂+♀- | ♂-♀+ |
|----------------------------|------------------------|----------------------|----------------------|------|------|
| fast evolving neo-Y genes  | 312                    | 22*                  | 9                    | 21*  | 8    |
| non-functional neo-Y genes | 1151                   | 53                   | 39                   | 55   | 50** |
| ancestral neo-sex genes    | 2951                   | 121                  | 82                   | 109  | 89   |

**table S9 Enriched GO terms for genes with neo-X biased expression using whole adult male *D. miranda* transcriptome data**

| GO ID      | Namespace          | Name                                         | P-value  |
|------------|--------------------|----------------------------------------------|----------|
| GO:0006032 | biological_process | chitin catabolic process                     | 3.37E-05 |
| GO:0044242 | biological_process | cellular lipid catabolic process             | 1.01E-04 |
| GO:0046165 | biological_process | alcohol biosynthetic process                 | 1.08E-04 |
| GO:0016042 | biological_process | lipid catabolic process                      | 2.53E-04 |
| GO:0034637 | biological_process | cellular carbohydrate biosynthetic process   | 3.00E-04 |
| GO:0042447 | biological_process | hormone catabolic process                    | 3.51E-04 |
| GO:0019319 | biological_process | hexose biosynthetic process                  | 5.14E-04 |
| GO:0006094 | biological_process | gluconeogenesis                              | 5.95E-04 |
| GO:0006026 | biological_process | aminoglycan catabolic process                | 5.96E-04 |
| GO:0046364 | biological_process | monosaccharide biosynthetic process          | 0.001352 |
| GO:0016115 | biological_process | terpenoid catabolic process                  | 0.00202  |
| GO:0016051 | biological_process | carbohydrate biosynthetic process            | 0.002257 |
| GO:0008300 | biological_process | isoprenoid catabolic process                 | 0.002948 |
| GO:0051983 | biological_process | regulation of chromosome segregation         | 0.003547 |
| GO:0035233 | biological_process | germ cell repulsion                          | 0.004042 |
| GO:0006716 | biological_process | juvenile hormone metabolic process           | 0.004785 |
| GO:0050919 | biological_process | negative chemotaxis                          | 0.005583 |
| GO:0000272 | biological_process | polysaccharide catabolic process             | 0.005859 |
| GO:0015850 | biological_process | organic alcohol transport                    | 0.007161 |
| GO:0005975 | biological_process | carbohydrate metabolic process               | 0.007392 |
| GO:0032008 | biological_process | positive regulation of TOR signaling cascade | 0.007742 |
| GO:0005737 | cellular_component | cytoplasm                                    | 0.002369 |
| GO:0005739 | cellular_component | mitochondrion                                | 0.003738 |
| GO:0044444 | cellular_component | cytoplasmic part                             | 0.004944 |
| GO:0044422 | cellular_component | organelle part                               | 0.00905  |
| GO:0003824 | molecular_function | catalytic activity                           | 1.66E-05 |
| GO:0005044 | molecular_function | scavenger receptor activity                  | 0.00121  |
| GO:0015665 | molecular_function | alcohol transmembrane transporter activity   | 0.006737 |
| GO:0016798 | molecular_function | hydrolase activity, acting on glycosyl bonds | 0.007026 |
| GO:0008252 | molecular_function | nucleotidase activity                        | 0.00802  |
| GO:0022892 | molecular_function | substrate-specific transporter activity      | 0.009791 |

**table S10 Enriched GO terms for genes with non-biased expression using whole adult male *D. miranda* transcriptome data**

| GO ID      | Namespace          | Name                                                                  | P-value  |
|------------|--------------------|-----------------------------------------------------------------------|----------|
| GO:0007526 | biological_process | larval somatic muscle development                                     | 0.009996 |
| GO:0006807 | biological_process | nitrogen compound metabolic process                                   | 0.006325 |
| GO:0048869 | biological_process | cellular developmental process                                        | 0.00257  |
| GO:0042052 | biological_process | rhabdomere development                                                | 0.003236 |
| GO:0019222 | biological_process | regulation of metabolic process                                       | 0.001836 |
| GO:0023052 | biological_process | signaling                                                             | 0.004301 |
| GO:0044260 | biological_process | cellular macromolecule metabolic process                              | 2.29E-06 |
| GO:0050789 | biological_process | regulation of biological process                                      | 1.96E-05 |
| GO:0050794 | biological_process | regulation of cellular process                                        | 0.002277 |
| GO:0080090 | biological_process | regulation of primary metabolic process                               | 0.003821 |
| GO:0051030 | biological_process | snRNA transport                                                       | 0.002899 |
| GO:0065007 | biological_process | biological regulation                                                 | 9.82E-06 |
| GO:0009892 | biological_process | negative regulation of metabolic process                              | 0.001328 |
| GO:0007275 | biological_process | multicellular organismal development                                  | 0.002672 |
| GO:0006139 | biological_process | nucleobase, nucleoside, nucleotide and nucleic acid metabolic process | 4.69E-04 |
| GO:0032501 | biological_process | multicellular organismal process                                      | 4.54E-05 |
| GO:0009987 | biological_process | cellular process                                                      | 3.11E-05 |
| GO:0043170 | biological_process | macromolecule metabolic process                                       | 0.00398  |
| GO:0032502 | biological_process | developmental process                                                 | 1.11E-05 |
| GO:0048519 | biological_process | negative regulation of biological process                             | 0.001082 |
| GO:0050890 | biological_process | cognition                                                             | 0.006286 |
| GO:0012505 | cellular_component | endomembrane system                                                   | 0.005167 |
| GO:0000808 | cellular_component | origin recognition complex                                            | 0.002323 |
| GO:0005637 | cellular_component | nuclear inner membrane                                                | 0.004013 |
| GO:0046930 | cellular_component | pore complex                                                          | 0.007205 |
| GO:0031300 | cellular_component | intrinsic to organelle membrane                                       | 0.004952 |
| GO:0005634 | cellular_component | nucleus                                                               | 0.003875 |
| GO:0005664 | cellular_component | nuclear origin of replication recognition complex                     | 0.005367 |
| GO:0022838 | molecular_function | substrate-specific channel activity                                   | 0.003839 |
| GO:0005217 | molecular_function | intracellular ligand-gated ion channel activity                       | 0.00549  |
| GO:0043028 | molecular_function | caspase regulator activity                                            | 0.003094 |
| GO:0004497 | molecular_function | monooxygenase activity                                                | 0.007181 |
| GO:0008036 | molecular_function | diuretic hormone receptor activity                                    | 0.004591 |
| GO:0015081 | molecular_function | sodium ion transmembrane transporter activity                         | 0.003233 |
| GO:0003676 | molecular_function | nucleic acid binding                                                  | 0.003049 |
| GO:0001071 | molecular_function | nucleic acid binding transcription factor activity                    | 0.001484 |
| GO:0005261 | molecular_function | cation channel activity                                               | 0.002825 |
| GO:0017056 | molecular_function | structural constituent of nuclear pore                                | 0.008358 |

---

|            |                    |                                            |          |
|------------|--------------------|--------------------------------------------|----------|
| GO:0022803 | molecular_function | passive transmembrane transporter activity | 0.002783 |
| GO:0016740 | molecular_function | transferase activity                       | 0.004313 |
| GO:0004948 | molecular_function | calcitonin receptor activity               | 0.006221 |

---



**table S11 Enriched GO terms for genes with neo-Y biased expression using whole adult male *D. miranda* transcriptome data**

| GO ID      | Namespace          | Name                                                                                         | P-value     |
|------------|--------------------|----------------------------------------------------------------------------------------------|-------------|
| GO:0009987 | biological_process | cellular process                                                                             | 3.79E-05    |
| GO:0000003 | biological_process | reproduction                                                                                 | 9.54E-05    |
| GO:0007320 | biological_process | insemination                                                                                 | 1.45E-04    |
| GO:0050789 | biological_process | regulation of biological process                                                             | 1.49E-04    |
| GO:0032504 | biological_process | multicellular organism reproduction                                                          | 1.72E-04    |
| GO:0022414 | biological_process | reproductive process                                                                         | 2.82E-04    |
| GO:0065007 | biological_process | biological regulation                                                                        | 3.17E-04    |
| GO:0051704 | biological_process | multi-organism process                                                                       | 3.30E-04    |
| GO:0048609 | biological_process | reproductive process in a multicellular organism                                             | 6.10E-04    |
| GO:0043226 | cellular_component | organelle                                                                                    | 7.40E-04    |
| GO:0048519 | biological_process | negative regulation of biological process                                                    | 9.13E-04    |
| GO:0009891 | biological_process | positive regulation of biosynthetic process                                                  | 0.001048829 |
| GO:0031328 | biological_process | positive regulation of cellular biosynthetic process                                         | 0.001246691 |
| GO:0005488 | molecular_function | binding                                                                                      | 0.00163262  |
| GO:0044087 | biological_process | regulation of cellular component biogenesis                                                  | 0.001795576 |
| GO:0044422 | cellular_component | organelle part                                                                               | 0.002164566 |
| GO:0009893 | biological_process | positive regulation of metabolic process                                                     | 0.00231426  |
| GO:0060537 | biological_process | muscle tissue development                                                                    | 0.002370667 |
| GO:0004222 | molecular_function | metalloendopeptidase activity                                                                | 0.002393485 |
| GO:0043170 | biological_process | macromolecule metabolic process                                                              | 0.003116358 |
| GO:0051173 | biological_process | positive regulation of nitrogen compound metabolic process                                   | 0.003870398 |
| GO:0032991 | cellular_component | macromolecular complex                                                                       | 0.004382914 |
| GO:0009953 | biological_process | dorsal/ventral pattern formation                                                             | 0.004435639 |
| GO:0007620 | biological_process | copulation                                                                                   | 0.004441265 |
| GO:0044424 | cellular_component | intracellular part                                                                           | 0.004458212 |
| GO:0044260 | biological_process | cellular macromolecule metabolic process                                                     | 0.004569214 |
| GO:0016817 | molecular_function | hydrolase activity, acting on acid anhydrides                                                | 0.005351765 |
| GO:0003676 | molecular_function | nucleic acid binding                                                                         | 0.006288673 |
| GO:0005622 | cellular_component | intracellular                                                                                | 0.006537098 |
| GO:0051254 | biological_process | positive regulation of RNA metabolic process                                                 | 0.007389792 |
| GO:0031325 | biological_process | positive regulation of cellular metabolic process                                            | 0.007520772 |
| GO:0007349 | biological_process | cellularization                                                                              | 0.007714538 |
| GO:0045935 | biological_process | positive regulation of nucleobase, nucleoside, nucleotide and nucleic acid metabolic process | 0.00794229  |
| GO:0010604 | biological_process | positive regulation of macromolecule metabolic process                                       | 0.009396109 |

**table S12 Linear regression coefficients of absolute expression vs. *Ka/Ks* ratio**

| Linear Regression Coefficient | autosomes    | chrXL/XR   | hemizygous neo-X | diploid neo-X |
|-------------------------------|--------------|------------|------------------|---------------|
| Testis                        | 0.1076***    | 0.1227***  | 0.1336***        | 0.09903***    |
| Testis (exp. level>20)        | 0.1326***    | 0.2133***  | 0.2484***        | 0.1211**      |
| Accessory Gland               | 0.03905***   | -0.02081   | 0.06193*         | 0.00123       |
| Acc. Gland (exp. level >20)   | 0.05152*     | -0.04293   | 0.1653**         | -0.03179      |
| Male Carcass                  | -0.08869***  | -0.1278*** | -0.09674***      | -0.11967***   |
| Male Carcass (exp. level>20)  | 0.03970      | 0.02899    | 0.12476*         | -0.01756      |
| Ovary                         | -0.015043    | -0.03914** | -3.333e-06       | -0.06875**    |
| Female Carcass                | -0.043908*** | -0.0698*** | -0.06045*        | -0.08923***   |

\* reflect significance levels of linear regression: \*\*\* ( $P<0.001$ ), \*\* ( $P<0.01$ ), \* ( $P<0.05$ ), others (not significant).

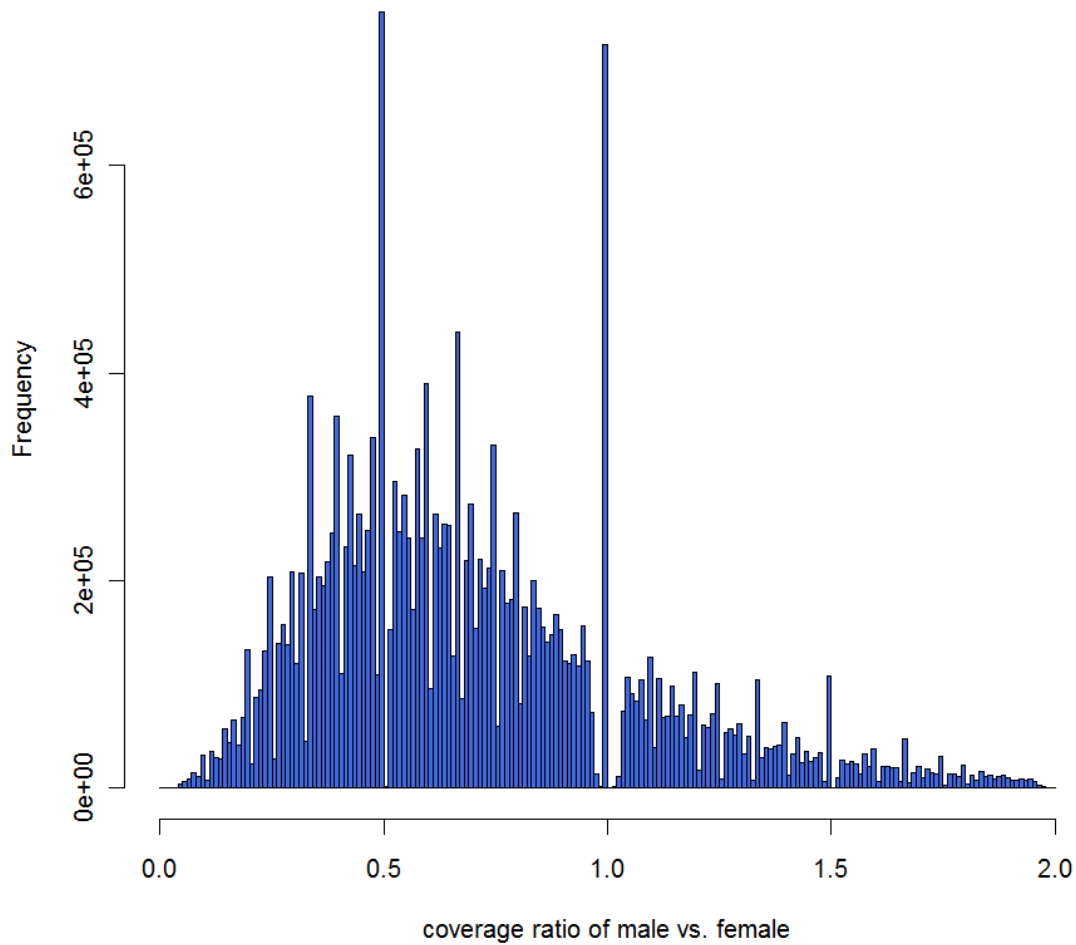

**fig. S1. Frequency distribution of male vs. female coverage ratios.**

We counted the number of reads mapped to each site of the neo-X scaffolds, and then investigated the frequency distribution of the ratio of male vs. female reads for all sites. The two pronounced peaks at 0.5 and 1 correspond to highly divergent and non-divergent sites between the neo-sex chromosomes.

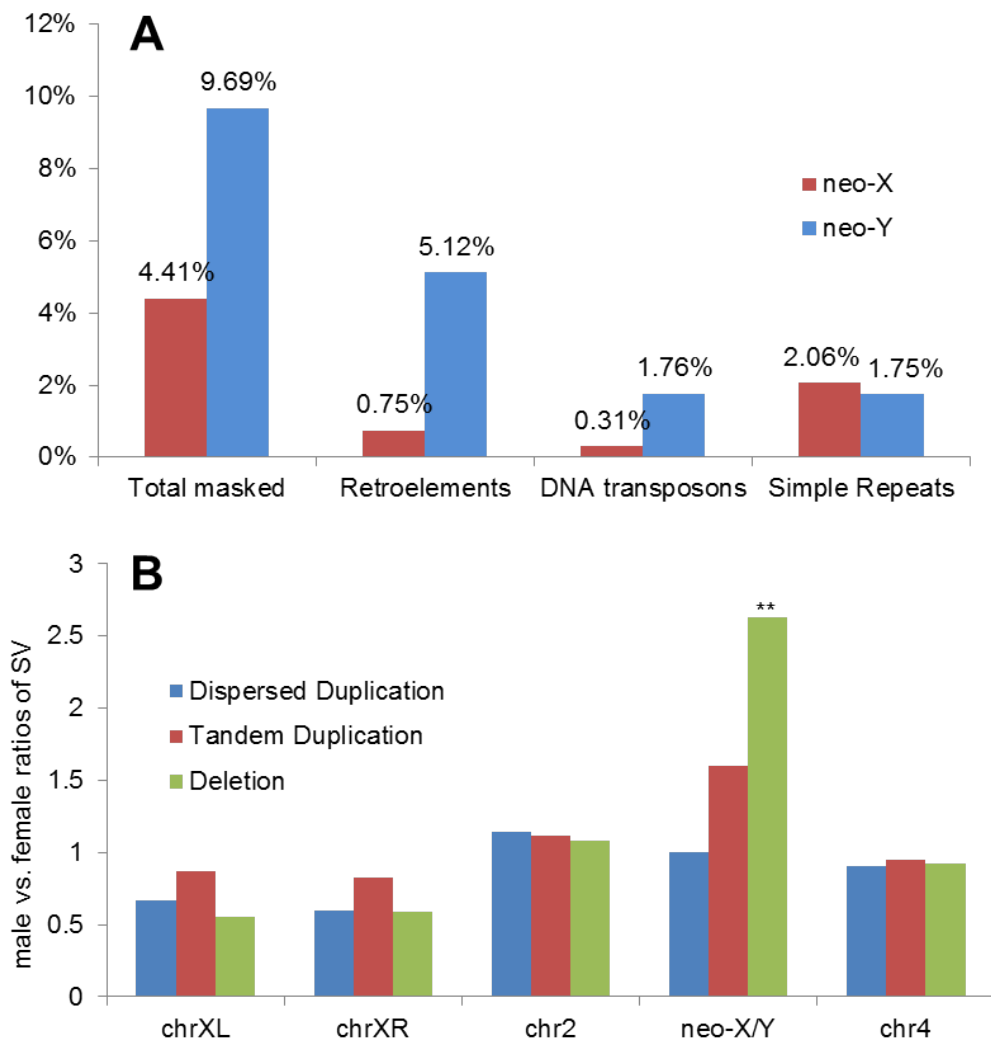

**fig. S2. Genomic divergence between the neo-X and neo-Y**

- (A)** We compared repeat contents of alignment gaps between homologous neo-X vs. neo-Y regions (i.e. insertions and deletions in either the neo-X or neo-Y chromosome). The neo-Y shows a 2-fold enrichment of repeats compared with the neo-X, which is mainly contributed by transposons or retroposons.
- (B)** Comparisons of structural variations derived from male data vs. female data. Their ratio along the neo-sex chromosomes should mainly reflect neo-X/Y divergence.

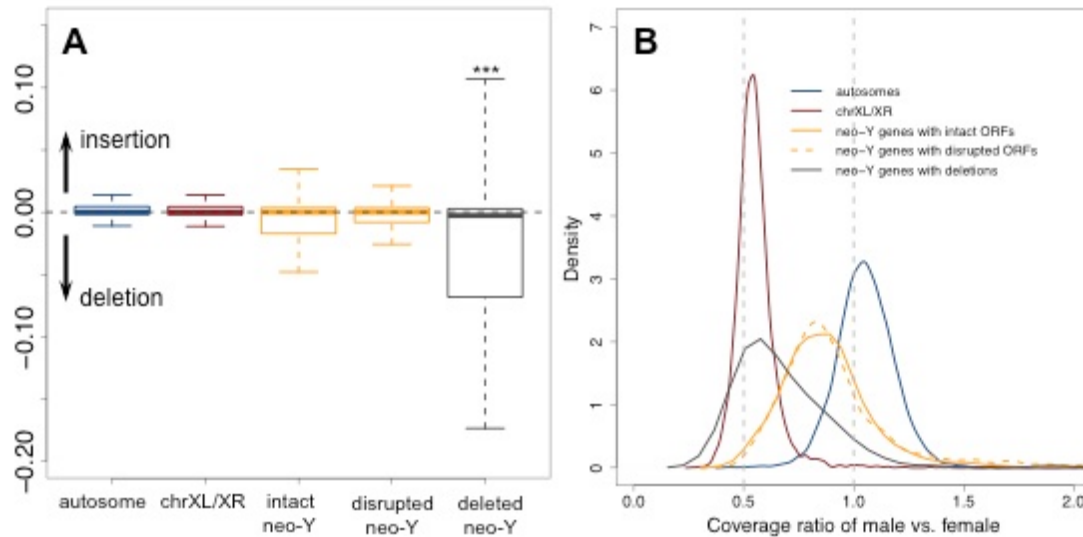

**fig. S3. Validation of partly or completely deleted genes from the neo-Y. (A)** Boxplots of length ratios of 454 male reads vs. their aligned regions in the Illumina assembly (excluding the neo-Y assembly). Neo-sex linked genes are divided into three categories: those with a functional neo-Y copy, a non-functional neo-Y copy, and those which are partly (or entirely) deleted from the neo-Y. Log-ratios lower than 0 indicate deletion events in the 454 reads, as expected if a partly or completely deleted neo-Y gene is aligned against its neo-X homolog. The length ratio of (partly) deleted neo-Y genes is significantly lower than that of other neo-sex genes (Wilcoxon test,  $P < 0.001$ ) **(B)** Density plots of read coverage ratios of male vs. female reads for different gene sets (using Illumina reads). Autosomes show equal read coverage between males and females while chrXL/XR show half of the female coverage in male. As expected, genes with neo-Y copies partially or completely deleted tend to have lower male vs. female ratio compared to other neo-sex linked genes.

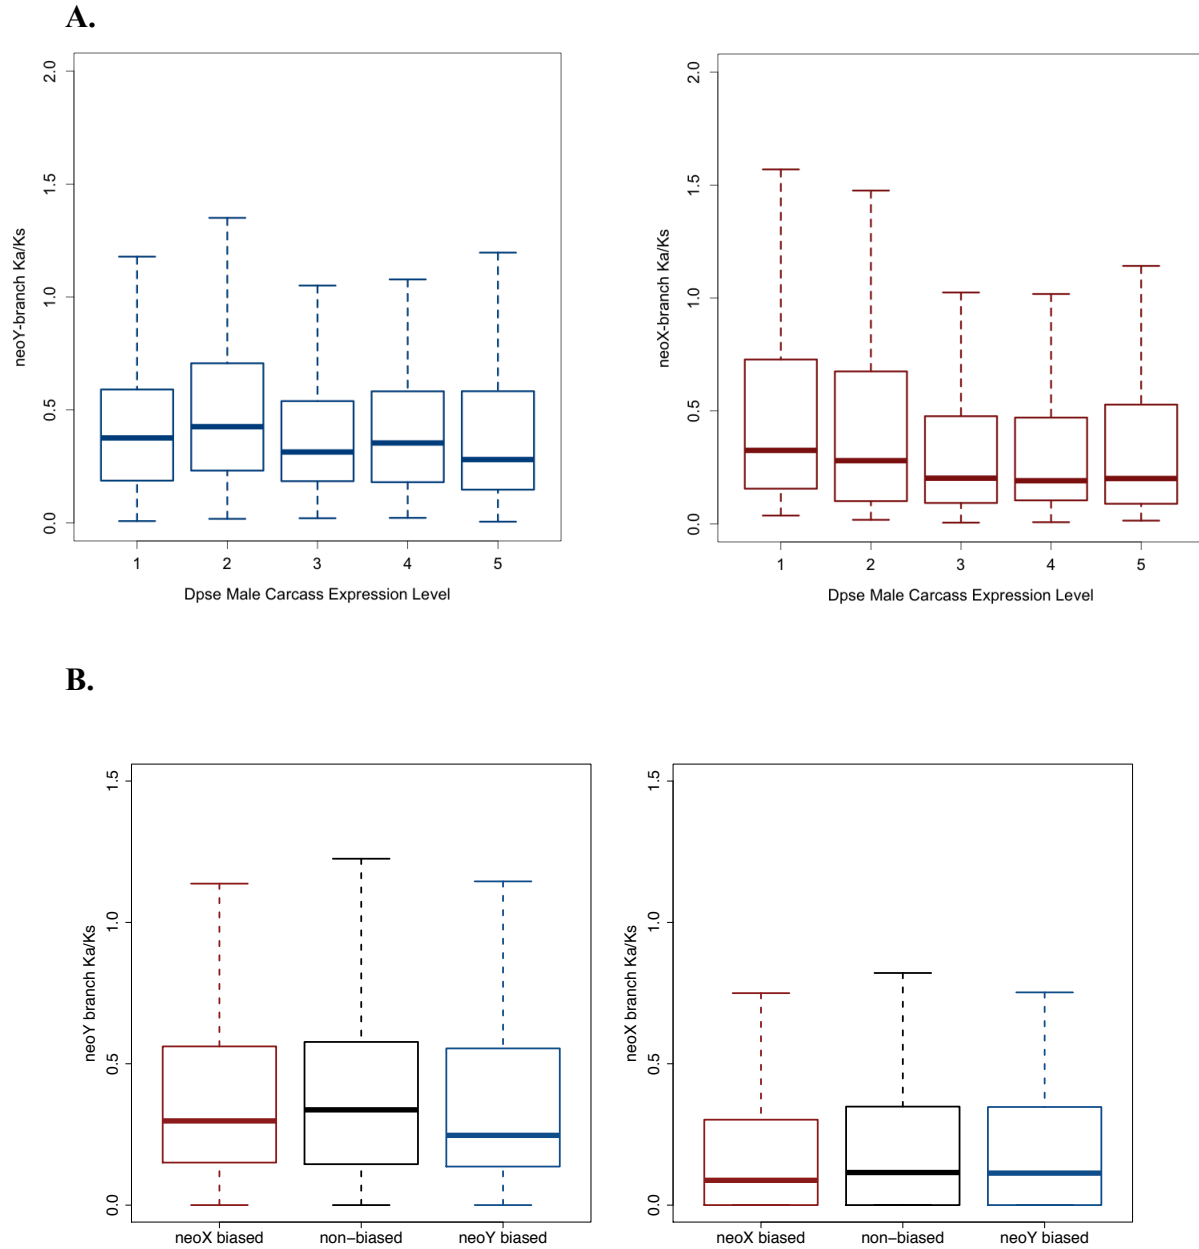

**fig. S4. Protein divergence ( $K_a/K_s$ ) along the neo-X and neo-Y chromosome for different expression categories. A.** Neo-sex linked genes were grouped into five equal-sized bins according to ancestral expression using *D. pseudoobscura* male carcass data (1-low expression; 5-high expression). Neo-Y genes generally show increased levels of protein evolution relative to neo-X genes, independent of ancestral expression levels. **B.** Neo-sex linked genes were grouped into those showing neo-X, neo-Y or non-biased expression (shown is neo-sex biased expression assayed in accessory glands). Neo-Y genes generally show increased levels of protein evolution relative to neo-X genes, independent of expression bias.

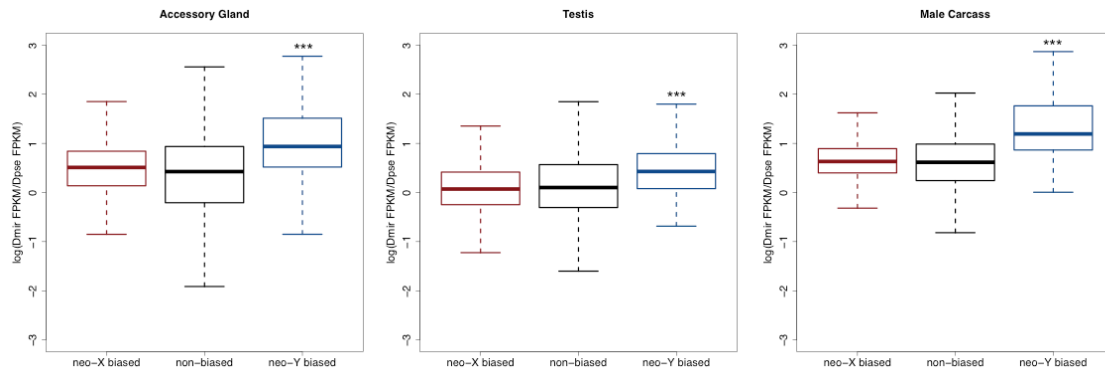

**fig. S5 Relative expression of neo-X-biased, neo-Y-biased and non-biased genes between *D. miranda* versus *D. pseudoobscura* for different tissues. Genes with neo-Y biased expression are expressed at a significantly higher level in *D. miranda* relative to *D. pseudoobscura* relative to neo-X biased or non-biased genes, indicating that neo-Y biased expression is caused by transcriptional up-regulation of neo-Y genes in *D. miranda*.**

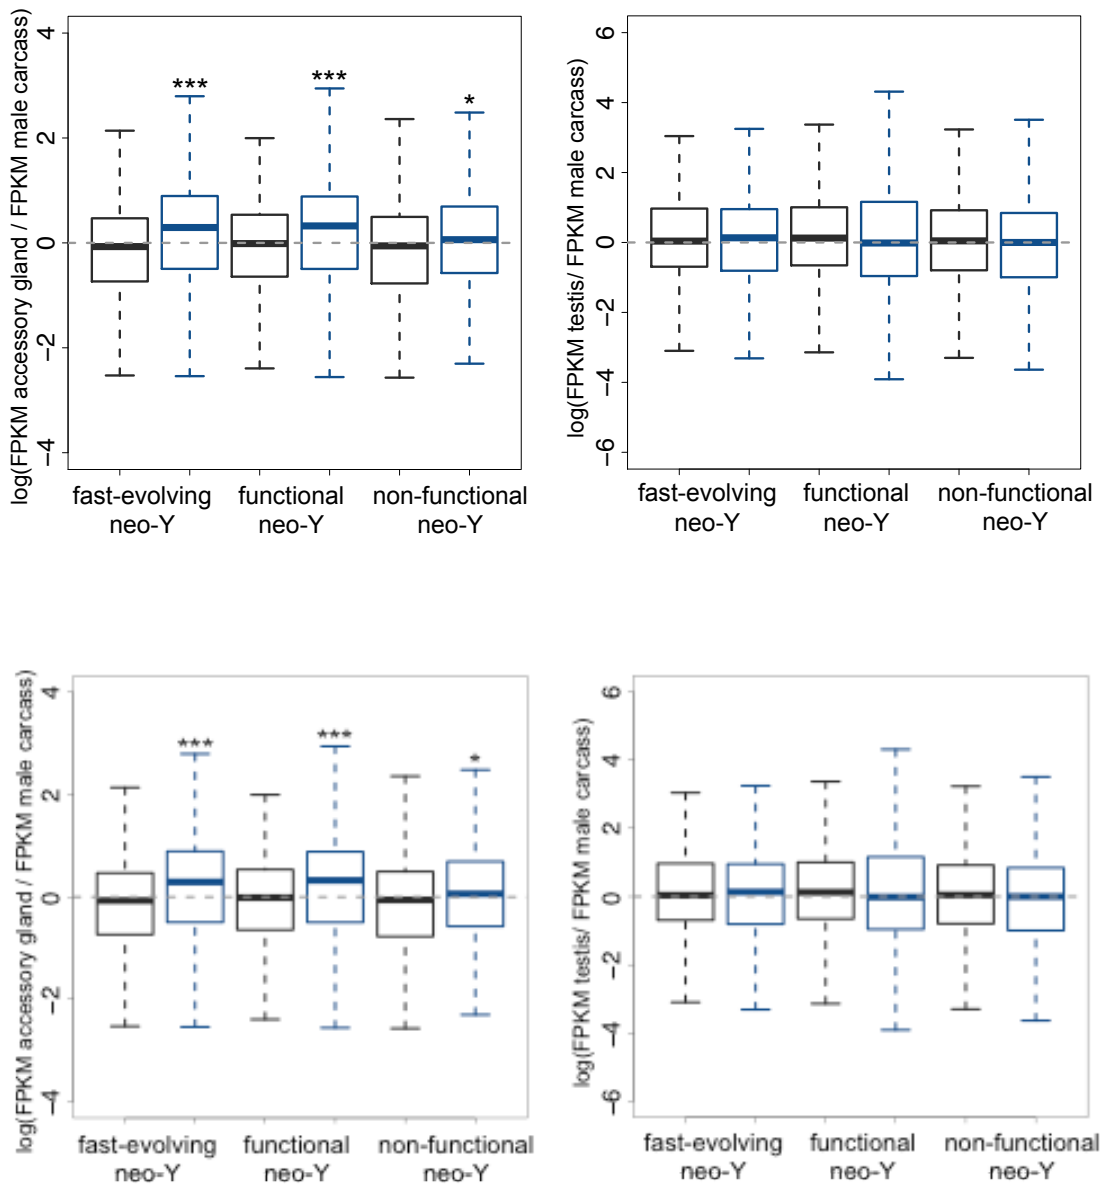

**fig. S6 Expression specificity** Tissue-specificity for testis and accessory gland genes (calculated as  $\log(\text{FPKM tissue} / \text{FPKM male somatic carcass})$ ) of *D. miranda* genes (blue) compared to their *D. pseudoobscura* orthologs (black) for neo-Y genes (top) chrXL, chrXR and the autosomes (bottom). *P*-values of Wilcoxon tests between fast-evolving ( $0.0005596$ ), functional ( $1.622e^{-06}$ ) and non-functional ( $0.019$ ) neo-Y genes versus their orthologous *D. pseudoobscura* genes are given.



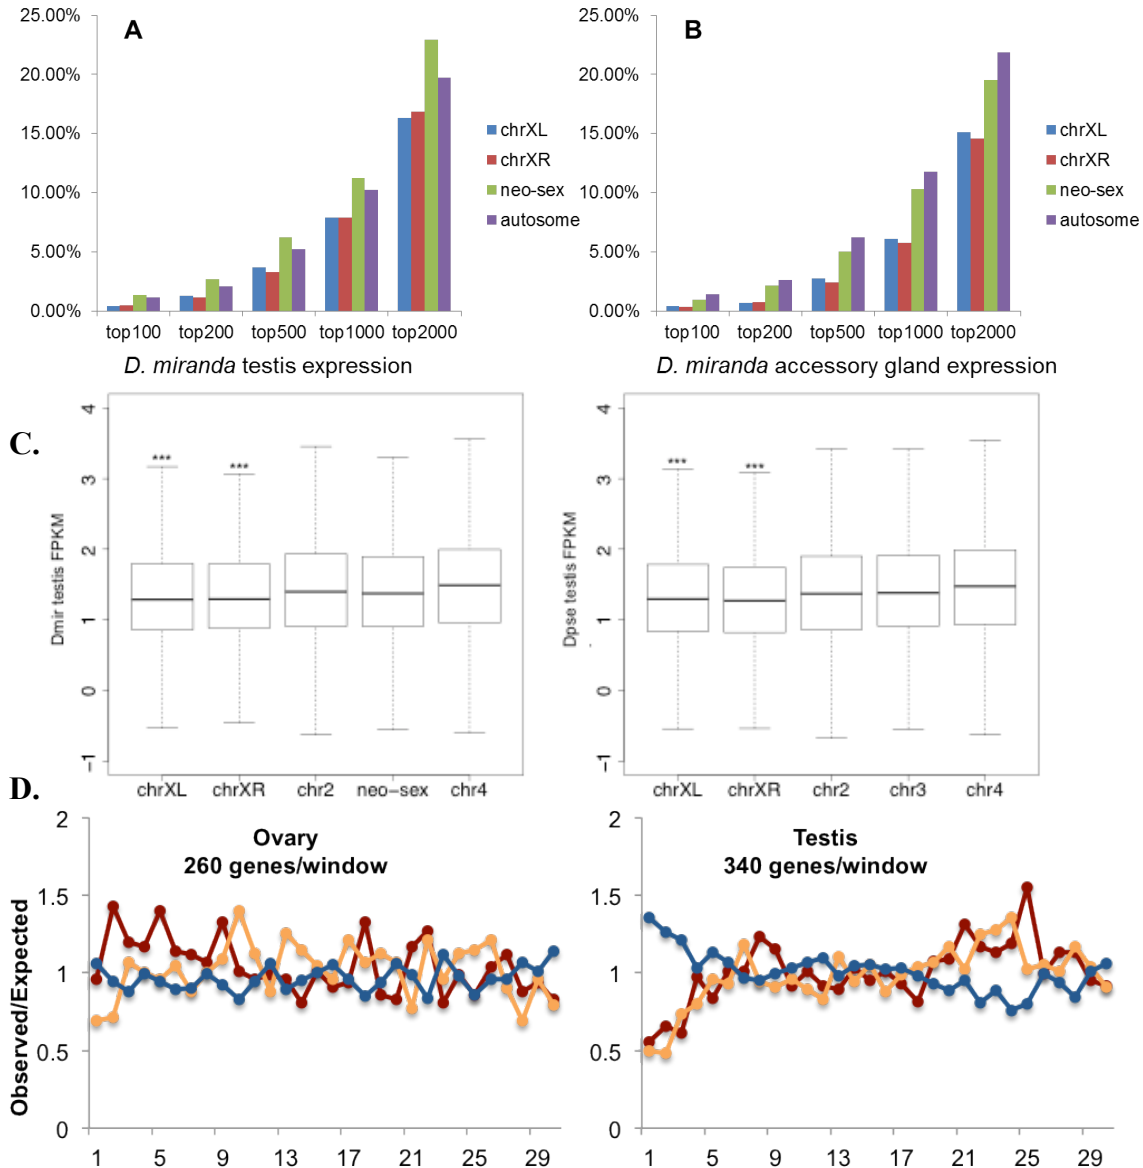

**fig. S7 Demasculinization vs. feminization of X chromosomes.** **A.** Chromosomal distribution of highly expressed testis and accessory gland genes in *D. miranda*. We investigated the proportions of highly expressed genes in testis and accessory glands from top 100 until top 2000 on each chromosome. ChrXL and chrXR consistently show a deficiency of genes highly expressed in testis and accessory glands compared to other chromosomes, regardless of the cut-off used. **C.** Log-based absolute expression levels (FPKM) from testis for each chromosome in *D. miranda* and *D. pseudoobscura*. **D.** Chromosomal distribution of ovary and testis genes binned by expression level in *D. miranda*. Genes were sorted according to their absolute expression level, and binned into 30 windows of equal size. For each window, the observed vs. expected number of genes in that window is calculated, assuming an even distribution. Blue lines are for autosomes, red lines for chrXL, and orange for chrXR.

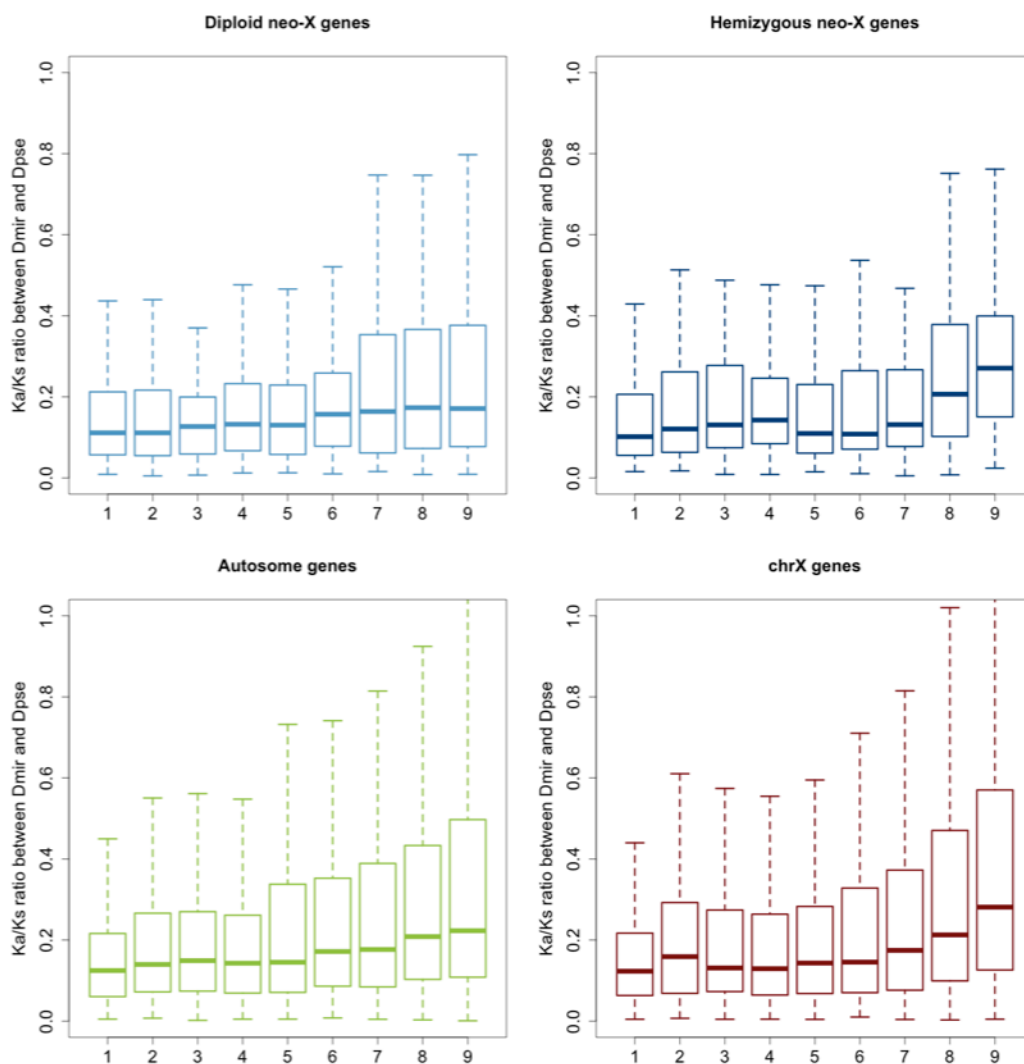

**fig. S8 Correlation between testis expression levels and Ka/Ks ratios.**

Each box contains the same numbers of genes and expression level increases from left to right along the x-axis (1-lowly expressed; 10-highly expressed). The hemizygous neo-X genes are shown in grey.

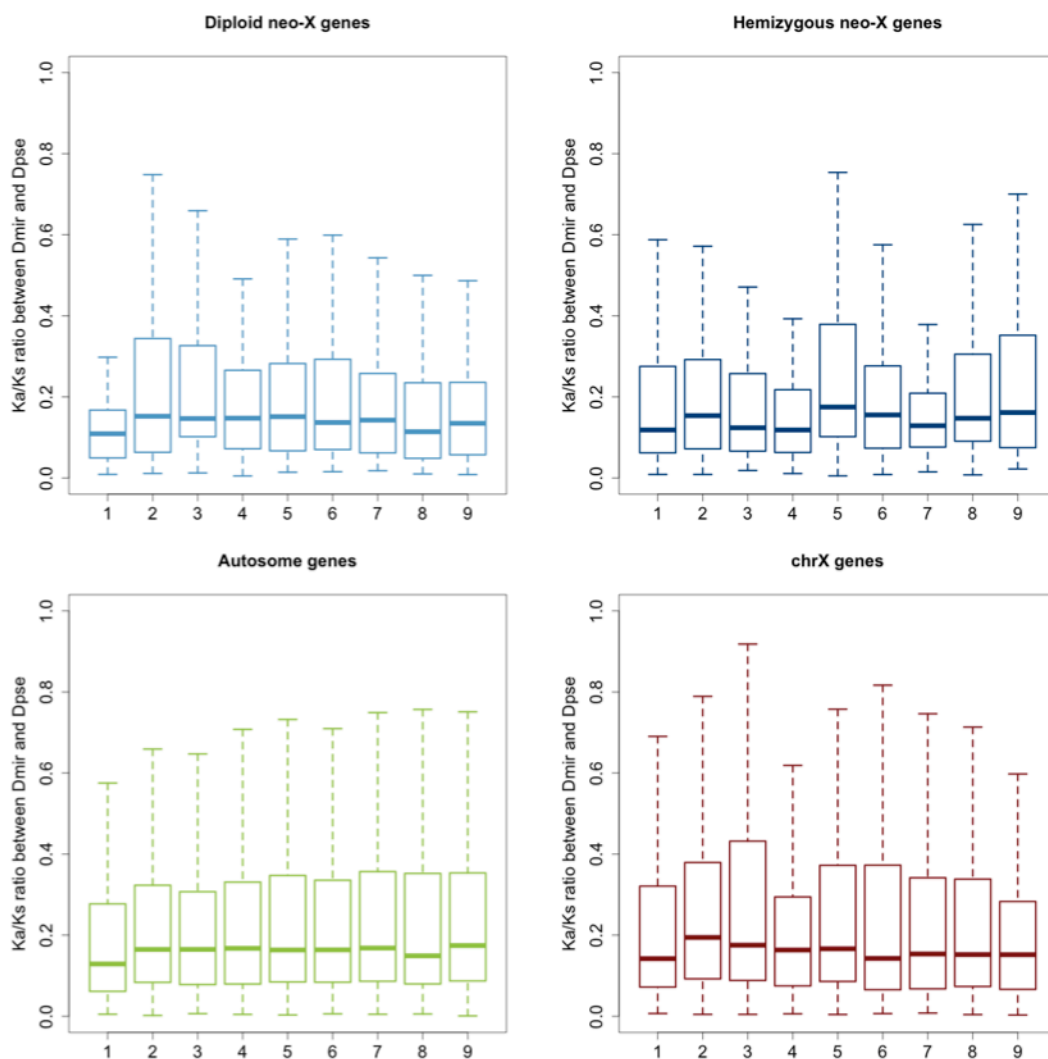

**fig. S9 Correlation between accessory gland expression levels and  $Ka/Ks$  ratios.**

Each box contains the same numbers of genes and expression level increases from left to right along the x-axis (1-lowly expressed; 9–highly expressed).

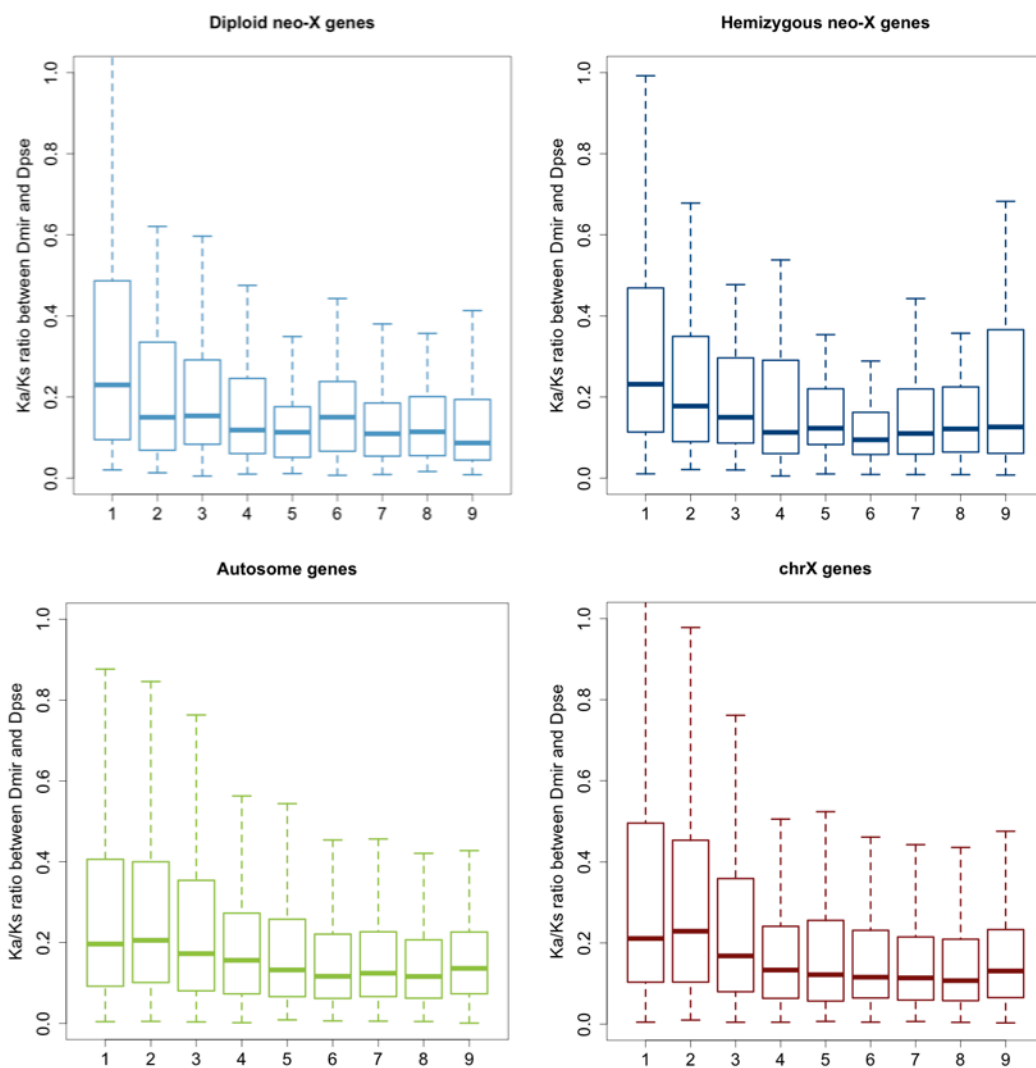

**fig. S10 Correlation between male carcass expression levels and  $Ka/Ks$  ratios.**

Each box contains the same numbers of genes and expression level increases from left to right along the x-axis (1-lowly expressed; 10-highly expressed). The hemizygous neo-X genes are shown in grey.

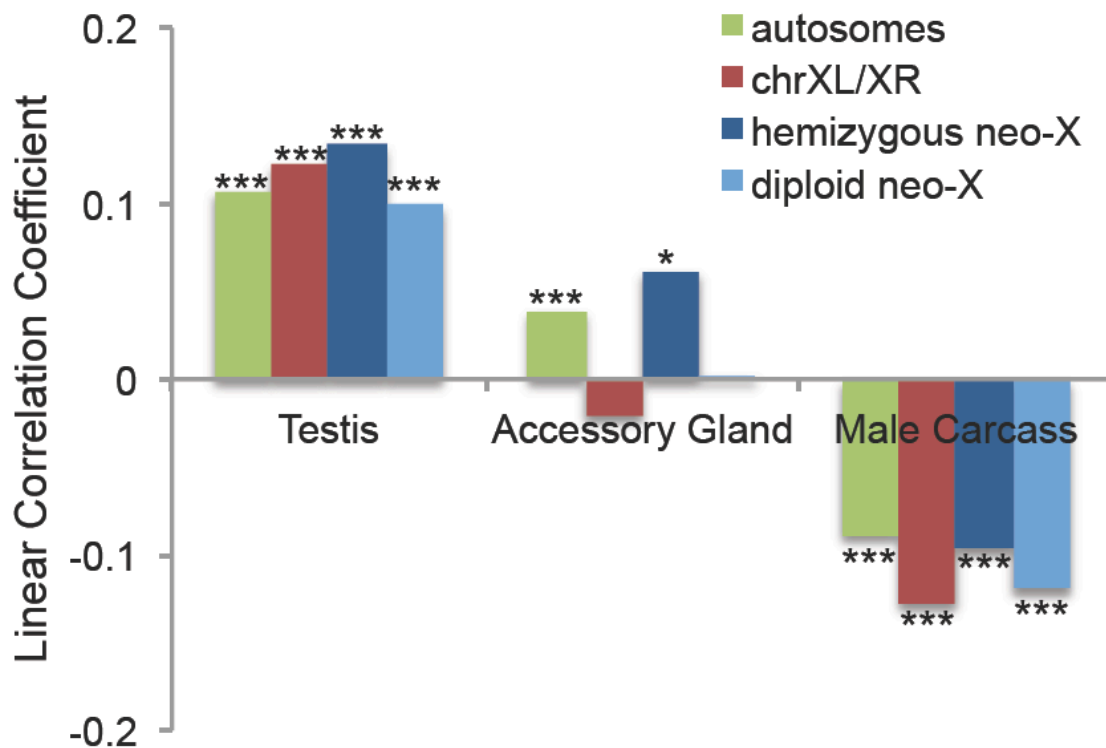

**fig. S11 Linear correlation coefficients between tissue expression levels vs.  $\omega$  ratio for sets of genes on different chromosomes and their significance levels.** Hemizygous (but not diploid) neo-X genes show a highly significant positive correlation between their absolute expression levels in accessory gland and  $\omega$  ratios (F-statistic comparing diploid vs. hemizygous neo-X genes,  $P < 0.05$ ). Genes more highly expressed in testis generally show faster rates of protein evolution, and this correlation is strongest for hemizygous neo-X genes (F-statistic comparing diploid vs. hemizygous neo-X genes,  $P = 0.076$ ). On the contrary, all chromosomes exhibit a significant negative correlation in male somatic carcass and female tissues ( $P < 10^{-3}$ ), indicating purifying selection on ubiquitously highly expressed genes (43). Masculinization of young X genes can be detected more readily on the neo-X than the ancestral X because the burst of adaptive evolution tends to be recent (44). Autosomal genes show a significant positive correlation between  $\omega$  and expression levels in both testis and accessory glands, suggesting that diploidy itself is not sufficient to prevent adaptation at male-genes (that is, a significant fraction of male advantageous alleles are dominant). In contrast to autosomes, diploid neo-X genes show female-biased transmission, which may oppose selection for male-beneficial alleles at such genes. ‘\*’ ( $P < 0.05$ ), ‘\*\*’ ( $P < 0.01$ ), ‘\*\*\*’ ( $P < 0.0001$ ).

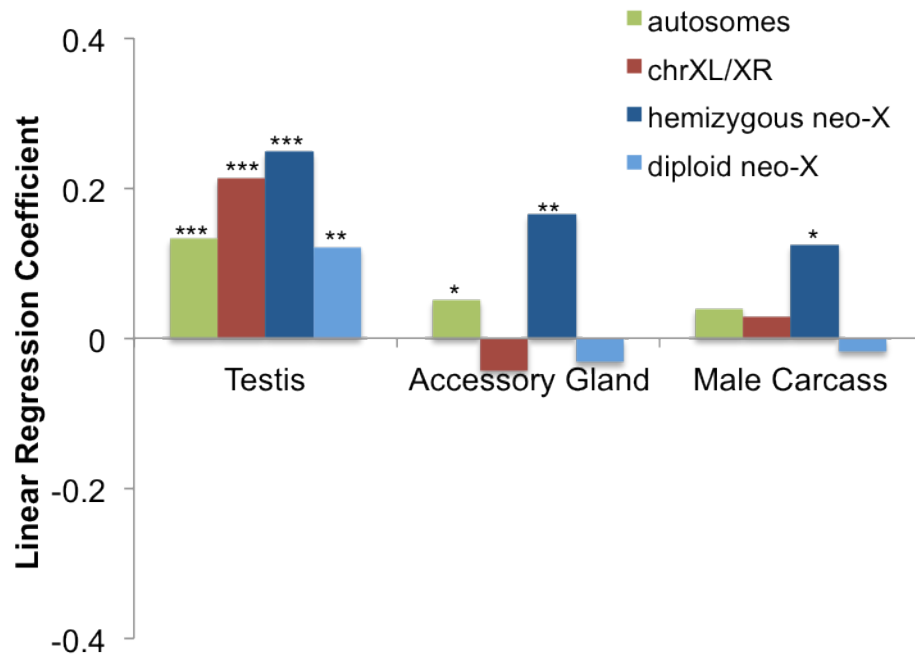

**fig. S12 Linear regression of tissue expression levels vs.  $\omega$  ratio for highly expressed genes.** Highly expressed genes are defined as those with FPKM > 20.

## References

26. R. Li *et al.*, *Genome Res.* **20**, 265 (Feb, 2010).
27. A. Bhutkar *et al.*, *Genetics* **179**, 1657 (Jul, 2008).
28. S. F. Altschul, W. Gish, W. Miller, E. W. Myers, D. J. Lipman, *Journal of molecular biology* **215**, 403 (Oct 5, 1990).
29. R. Li, Y. Li, K. Kristiansen, J. Wang, *Bioinformatics* **24**, 713 (2008).
30. R. Li *et al.*, *Genome Res* **19**, 1124 (Jun, 2009).
31. S. Marion de Procé, D. Halligan, P. Keightley, B. Charlesworth, *Journal of Molecular Evolution* **69**, 601 (2009).
32. E. Birney, M. Clamp, R. Durbin, *Genome research* **14**, 988 (May, 2004).
33. M. Krzywinski *et al.*, *Genome Res* **19**, 1639 (Sep, 2009).
34. J. M. Cridland, K. R. Thornton, *Genome Biol Evol* **2**, 83 (2010).
35. S. Bauer, S. Grossmann, M. Vingron, P. N. Robinson, *Bioinformatics* **24**, 1650 (Jul 15, 2008).
36. F. Abascal, R. Zardoya, M. J. Telford, *Nucleic acids research* **38**, W7 (Jul, 2010).
37. Z. Yang, R. Nielsen, *Mol Biol Evol* **17**, 32 (Jan, 2000).
38. Z. Yang, R. Nielsen, *Mol Biol Evol* **19**, 908 (Jun, 2002).
39. Z. Yang, *Mol Biol Evol* **15**, 568 (May, 1998).
40. S. Vicario, E.N. Moriyama, J.R. Powell, *BMC Evol Bio* **7**, 1471 (November 2007)
41. C. Trapnell, L. Pachter, S. L. Salzberg, *Bioinformatics* **25**, 1105 (May 1, 2009).
42. C. Trapnell *et al.*, *Nat Biotechnol* **28**, 511 (May, 2010).
43. A. M. Larracuente *et al.*, *Trends Genet.* **24**, 114 (Mar, 2008).
44. D. Bachtrog, J. D. Jensen, Z. Zhang, *PLoS Biol.* **7**, e82 (Apr 14, 2009).
